# Supplementary material for: Neurological involvement among non-hospitalized adolescents and young adults 6 months after acute COVID-19
Source: Front Neurol. 2024 Feb 7;15:1345787. doi: 10.3389/fneur.2024.1345787 (PMC10879600; doi:10.3389/fneur.2024.1345787)
Supplement: Supplementary file 1 [file Table_1.XLSX]

## Sheet: Supplementary table 1
Sidak pairwise comparison between groups of COVID-19 status/PCC adherance for variables with significant differnces between means in ANOVA analysis
	COVID+PCC+ vs.			COVID-PCC- vs.		COVID-PCC- vs.
	COVID+PCC-	COVID-PCC+	COVID-PCC-	COVID-PCC+	COVID-PCC-	COVID-PCC-
Concentration difficulty
Difference in means	-1.45	-0.82	-1.24	1.37	0.213	-1.16
p-value	<0.001	0.999	<0.001	<0.001	0.843	<0.001
Difficulty making decisions
Difference in means	-1.11	-3.27	-1.07	0.78	0.03	-0.75
p-value	<0.001	0.441	<0.0010	<0.0010	1.000	0.01
Memory difficulty
Difference in means	-1.20	-0.34	-1.11	0.86	0.09	-0.77
p-value	<0.001	0.415	<0.001	<0.001	0.997	0.011
Feeling confused or disoriented
Difference in means	-0.62	-0.30	-0.58	0.32	0.09	-0.28
p-value	<0.001	0.221	<0.001	0.016	1.000	0.552
Headache
Difference in means	-0.94	-0.31	-0.60	0.63	0.33	-0.30
p-value	<0.001	0.295	0.001	0.001	0.161	0.59
Worst pain
Difference in means	-1.45	0.77	-0.36	2.22	1.09	-1.13
p-value	<0.001	0.251	0.090	<0.001	0.018	0.108
Least pain
Difference in means	-0.49	-0.52	-0.11	-0.3	0.38	0.40
p-value	0.002	0.131	0.996	1.000	0.40	0.634
Pain on average
Difference in means	-1.23	-0.14	-0.64	1.09	0.59	-0.49
p-value	<0.001	0.996	0.082	<0.001	0.118	0.610
Pain right now
Difference in means	-0.69	0.01	-0.74	0.69	-0.05	-0.74
p-value	<0.001	1.000	0.006	0.018	1.000	0.063
Brief pain inventory total score
Difference in means	-3.86	0.12	-1.85	3.97	2.01	-1.96
p-value	<0.001	1.000	0.105	<0.001	0.058	0.288
Karolinska sleep questionnaire
Difference in means	14.29	2.05	10.69	-12.25	-3.60	8.65
p-value	<0.001	0.840	<0.001	<0.001	0.209	0.001
Awakening problems
Difference in means	4.47	0.44	3.34	-4.03	-1.13	2.90
p-value	<0.001	0.981	<0.001	<0.001	0.287	0.001
Sleepiness
Difference in means	4.56	0.93	3.40	-3.63	-1.15	2.48
p-value	<0.001	0.613	<0.001	<0.001	0.300	0.012
Insomnia
Difference in means	4.13	0.51	3.09	-3.62	-1.04	2.59
p-value	<0.001	0.981	<0.001	<0.001	0.571	0.025

## Sheet: Supplementary table 2
Cross-sectional comparison of Symptoms, clinical and laboratory findings, and cognitive test results among COVID-19 cases and non-COVID controls for participants with and without PIFS at 6 months follow-up.
Reported symptoms	COVID-19 cases			Non-COVID controls
	COVID+PIFS+	COVID+PIFS-		COVID-PIFS+	COVID-PIFS-	p-valuea
Cognitive symptoms
Concentration difficulty, score -mean (SD)	4.0 (1.0)	2.3v(1.3)		4.0 (0.8)	2.5 (1.2)	<0.001
Confidence interval	3.7-4.3	2.2-2.5		3.2-4.8	2.2-2.8
Difficulty making decisions, score -mean (SD)	3.4 (1.2)	1.9 (1.1)		2.9 (1.1)	1.8 (1.1)	<0.001
Confidence interval	3.1-3.7	1.7-2.0		1.9-3.9	1.6-2.1
Memory difficulty, score -mean (SD)	3.6 (1.1)	2.1 (1.2)		3.6 (1.0)	2.0 (1.2)	<0.001
Confidence interval	3.3-3-9	1.9-2.2		2.7-4.5	1.7-2.3
Feeling confused or disoriented, score -mean (SD)	2.4 (1.2)	1.3 (0.8)		1.7 (0.8)	1.3 (0.7)	<0.001
Confidence interval	2.0-2.7	1.3-1.5		1.0-2.4	1.1-1.5
Sleep
Karolinska sleep questionnaire, -mean (SD)	32.8 (8.7)	50.6 (11.7)		36.6 (5.7)	48.3 (9.9)	<0.001
Confidence interval	30.4-35.2	49.3-51.8		31.3-41.9	46.1-50.6
Insomnia, -mean (SD)	12.6 (5.0)	17.4 (4.2)		13.4 (5.1)	16.8 (4.1)	<0.001
Confidence interval	11.3-14.0	16.9-17.9		8.7-18.2	15.9-17.7
Awakening problems, -mean (SD)	6.1 (2.5)	12.0 (3.9)		6.9 (2.5)	11.2 (3.3)	<0.001
Confidence interval	5.5-6.8	11.6-12.4		4.5-9.2	10.4-11.9
Sleepiness, -mean (SD)	11.4 (3.1)	17.4 (4.0)		13.4 (3.6)	16.7 (3.5)	<0.001
Confidence interval	10.6-12.3	16.9-17.8		10.1-16.8	15.9-17.5
Pain
Headache, score -mean (SD)	3.2 (0.8)	1.9 (1.0)		3.0 (1.0)	2.0 (0.9)	<0.001
Confidence interval	2.9-3.4	1.8-2.0		2.2-3.7	1.8-2.2
Brief pain inventory total score, mean (SD)	13.5 (5.4)	8.9 (4.8)		12.0 (3.6)	10.5 (4.6)	<0.001
Confidence interval	12.0-15.0	8.4-9.5		8.7-15.3	9.5-11.6
Worst pain in 24 h, mean (SD)	5.3 (2.3)	3.4 (2.2)		5.6 (2.6)	4.5(2.3)	<0.001
Confidence interval	4.7-6.0	3.1-3.6		3.1-8.0	4.0-5.0
Least pain in 24 hours, mean (SD)	2.0 (1.3)	1.6 (1.3)		1.3 (0.5)	1.6 (1.5)	<0.001
Confidence interval	1.6-2.4	1.4-1.7		0.8-1.7	1.28-1.9
Pain on average, mean (SD)	3.7 (1.7)	2.3 (1.5)		3.1 (1.2)	2.7 (1.8)	<0.001
Confidence interval	3.3-4.2	2.2-2.5		2.0-4.3	2.3-3.1
Pain right now, mean (SD)	2.4 (1.5)	1.6 (1.4)		2.0 (0.8)	1.7 (1.1)	0.001
Confidence interval	2.0-2.8	1.5-1.8		1.2-2.8	1.4-1.9
Neurological findings and brain injury biomarkers
Neurological examination, any findings -No. (%)	12(3.7%)	1(1.9%)		5(6.4%)	0(0%)	0.5266
Neurofilament light chain, pg/mL, median (iqr)	4.6 (1.4)	4.7 (2.2)		4.9 (3.7)	4.6 (1.7)	0.827b
Confidence interval	4.2-5.0	4.4-4.9		2.7-7.7	4.3-4.9
Glial fibrillary acidic protein, pg/mL, median (iqr)	65.7 (28.6)	64.9 (36.3)		73.1 (39.1)	71.0 (33.3)	0.834b
Confidence interval	58.8-72.2	61.4-69.0		36.5-123.0	59.6-77.8
Cognitive test results
Digit span forward, total sum score -mean (SD)	9.6 (2.4)	10.0 (2.5)		11.5 (2.7)	9.3 (2.2)	0.0373
Confidence interval	8.9-10.3	9.7-10.3		8.7-14.3	8.8-9.8
Digit span backward, total sum score -mean (SD)	5.6 (2.1)	6.1 (2.3)		7.7 (2.2)	5.6 (2.4)	0.0667
Confidence interval	5.0-6.2	5.84-6.35		5.4-9.9	5.0-6.2
Digit span summary score, -mean (SD)	15.2 (3.6)	16.1 (4.2)		19.2 (4.3)	14.9 (4.0)	0.0146
Confidence interval	14.2-16.2	15.6-16-6		14.7-23.6	14.0-15.8
Hopkins verbal learning test-revised
HVLT-R, immediate recall, total sum score -mean (SD)	23.7 (4.9)	23.7 (4.5)		26.7 (5.1)	22.7 (4.8)	0.145
Confidence interval	22.3-25.1	23.2-24.2		21.0- 31.7	21.6-23.7
HVLT-R, delayed recall, total sum score -mean (SD)	8.44 (2.5)	8.3 (2.2)		10.1 (1.9)	7.7 (2.4)	0.032
Confidence interval	7.7-9.1	8.1-8.5		8.2-12.2	7.1-8.2
HVLT-R correct recognition, mean (SD)	11.3 (1.2)	11.4 (0.9)		11.8 (0.4)	11.4 (0.9)	0.545
Confidence interval	11.0-11.6	11.3-11.5		11.4-12.2	11.2-11.6
HVLT-R false recognition, mean (SD)	0.4 (0.9)	0.3 (0.6)		0(0)	0.5 (0.9)	0.193
Confidence interval	0.1-0.6	0.2-0.4			0.3-0.6
a) oneway anova unless otherwise stated
b) kruskal-wallis

## Sheet: Supplementary table 3
Sidak pairwise comparison between groups of COVID-19 status/PIFS adherance for variables with significant differnces between means in ANOVA analysis
	COVID+PIFS+ vs.			COVID-PIFS- vs.		COVID-PIFS- vs.
	COVID+PIFS-	COVID-PIFS+	COVID-PIFS-	COVID-PIFS+	COVID-PIFS-	COVID-PIFS-
HVLT-R delayed recall
Difference in means	-0.133	1.724	-0.70	1.86	-0.57	-2.42
p-valuea	0.999	0.379	0.408	0.245	0.252	0.067
Digit span summary
Difference in means	0.916	3.974	-0.269	3.059	-1.185	-4.244
p-value	0.578	0.138	0.999	0.351	0.124	0.084
Digit span forward
Difference in means	0.452	1.942	-0.237	1.490	-0.689	-2.179
p-value	0.768	0.334	0.995	0.592	0.145	0.195
Concentration difficulty
Difference in means	-1.69	-0.037	-1.52	1.652	0.165	-1.49
p-value	0.000	1.000	0.000	0.003	0.869	0.014
Difficulty making decisions
Difference in means	-1.50	-0.52	-1.53	0.98	-0.03	-1.01
p-value	0.000	0.826	0.000	0.131	1.000	0.134
Memory difficulty
Difference in means	-1.50	0.01	-1.55	1.51	-0.05	-1.56
p-value	0.000	1.000	0.000	0.004	1.000	0.005
Feeling confused or disoriented
Difference in means	-1.01	-0.66	-1.03	0.35	-0.02	-0.37
p-value	0.000	0.252	0.000	0.851	1.000	0.837
Headache
Difference in means	-1.22	-1.15	-1.11	1.07	0.11	-0.96
p-value	0.000	0.999	0.000	0.017	0.927	0.054
Worst pain
Difference in means	-1.95	0.23	-0.85	2.18	1.10	-1.08
p-value	0.000	1.000	0.179	0.063	0.001	0.772
Least pain
Difference in means	-0.42	-0.71	-0.38	-0.30	0.03	0.33
p-value	0.177	0.689	0.470	0.992	1.000	0.988
Pain on average
Difference in means	-1.37	-0.57	-0.99	0.80	0.39	-0.41
p-value	0.000	0.938	0.003	0.718	0.288	0.987
Pain right now
Difference in means	-0.81	-0.43	-0.75	0.37	0.05	-0.32
p-value	0.000	0.965	0.012	0.979	1.000	0.992
Brief pain inventory total score
Difference in means	-4.55	-1.49	-2.98	3.06	1.57	-1.49
p-value	0.000	0.970	0.003	0.459	0.059	0.967
Karolinska sleep questionnaire
Difference in means	17.8	3.80	15.55	-13.99	-2.24	11.75
p-value	0.000	0.950	0.000	0.006	0.498	0.042
Awakening problems
Difference in means	5.84	0.73	5.06	-5.12	-0.78	4.34
p-value	0.000	0.997	0.000	0.002	0.435	0.017
Sleepiness
Difference in means	5.93	1.99	5.27	-3.94	-0.66	3.28
p-value	0.000	0.719	0.000	0.040	0.665	0.160
Insomnia
Difference in means	4.76	0.79	4.13	-3.98	-0.64	3.34
p-value	0.000	0.998	0.000	0.093	0.810	0.266
a) Sidak pairwise multiple comparison test

## Sheet: Supplementary table 4
		PCC	PIFS	Concentration difficulty	Difficulty making decisions	Memory difficulty	Feeling confused or disoriented	Headache	Brief pain inventory total score	Karolinska sleep questionnaire	Neurological examination	HVLT-R immediate recall	HVLT-R delayed recall	HVLT-R correct recognition	HVLT-R false recognition	Digit span summary score	Digit span forward	Digit span backward	Neurofilament light chain	Glial fibrillary acidic protein
PIFS	Spearmans Rho	0.425831
	P-value	3.70305e-17
Concentration difficulty	Spearmans Rho	0.555325	0.426752
	P-value	2.85208e-30	3.11702e-17
Difficulty making decisions	Spearmans Rho	0.47462	0.404176	0.697323
	P-value	1.86585e-21	1.83963e-15	2.74697e-53
Memory difficulty	Spearmans Rho	0.496946	0.410616	0.677936	0.679372
	P-value	1.15409e-23	5.92982e-16	2.24549e-49	1.17969e-49
Feeling confused or disoriented	Spearmans Rho	0.380981	0.378034	0.52564	0.449428	0.517006
	P-value	8.90173e-14	1.42635e-13	9.43351e-27	3.76753e-19	8.6022e-26
Headache	Spearmans Rho	0.470859	0.415654	0.503153	0.377153	0.43134	0.391038
	P-value	4.23854e-21	2.40407e-16	2.62333e-24	1.64045e-13	1.30979e-17	1.71892e-14
Brief pain inventory total score	Spearmans Rho	0.377979	0.311189	0.29754	0.261122	0.257517	0.277747	0.482656
	P-value	1.43879e-13	1.86696e-09	9.89718e-09	5.62941e-07	8.13911e-07	9.56517e-08	3.12205e-22
Karolinska sleep questionnaire	Spearmans Rho	-0.550755	-0.476843	-0.661345	-0.564925	-0.554053	-0.429334	-0.511636	-0.426202
	P-value	1.047e-29	1.14336e-21	2.93884e-46	1.73688e-31	4.10401e-30	1.91663e-17	3.29699e-25	3.45483e-17
Neurological examination	Spearmans Rho	-0.025349	-0.0329503	-0.110492	-0.0551265	-0.00767805	0.0660437	-0.0135684	0.00621204	0.0865197
	P-value	0.633111	0.534887	0.0369096	0.298934	0.885054	0.21319	0.798353	0.90689	0.102665
HVLT-R immediate recall	Spearmans Rho	-0.0651936	-0.0088808	0.00721731	0.0422001	-0.0547115	-0.0803898	0.0357482	-0.0607192	-0.0509919	0.0047612
	P-value	0.219153	0.867203	0.891908	0.426669	0.302593	0.129507	0.500764	0.252504	0.336698	0.928569
HVLT-R delayed recall	Spearmans Rho	0.000411591	0.0223912	0.0313544	0.0604014	-0.0216699	-0.0533523	0.0725416	-0.0350575	-0.0593425	0.0187172	0.760106
	P-value	0.993817	0.673289	0.554861	0.255	0.683236	0.31478	0.171428	0.509079	0.26344	0.724507	1.91141e-68
HVLT-R correct recognition	Spearmans Rho	0.0018844	-0.00710396	-0.00167223	-0.00698304	-0.0159449	-0.0400216	0.0358846	-0.057566	0.00585661	0.0567689	0.475154	0.433349
	P-value	0.971697	0.893595	0.974883	0.895396	0.764	0.450948	0.49913	0.278027	0.912195	0.284746	1.65916e-21	8.92427e-18
HVLT-R false recognition	Spearmans Rho	0.0645735	0.00339021	0.0380623	0.0105813	-0.0283084	-0.00761273	0.00164687	0.0417271	0.00057676	-0.0614052	-0.251515	-0.214544	-0.074673
	P-value	0.223577	0.949104	0.473433	0.842081	0.593963	0.886025	0.975263	0.431875	0.991336	0.247174	1.48557e-06	4.36691e-05	0.159154
Digit span summary score	Spearmans Rho	-0.0171882	-0.0759508	0.0130692	0.0187567	-0.107407	-0.0315156	-0.033758	-0.0229335	-0.0389479	-0.0542426	0.173403	0.163423	0.0918378	0.0259771
	P-value	0.746206	0.15212	0.805621	0.72395	0.042545	0.552827	0.524918	0.665849	0.463194	0.306761	0.00100252	0.00194961	0.0831307	0.624711
Digit span forward	Spearmans Rho	-0.00268766	-0.0622043	-0.00775767	-0.00917311	-0.110092	-0.0542644	0.0032887	-0.00666356	-0.030902	-0.0331564	0.0787726	0.0993496	0.0929003	0.0585618	0.862363
	P-value	0.959641	0.241065	0.88387	0.862874	0.0376034	0.306566	0.950626	0.900156	0.560589	0.532335	0.137423	0.0607634	0.0796131	0.269784	5.65475e-107
Digit span backward	Spearmans Rho	-0.0284649	-0.086926	0.0260644	0.0463311	-0.0908812	-0.0169984	-0.0645269	-0.0318983	-0.03136	-0.0794638	0.214628	0.18686	0.0528798	-0.01056	0.811391	0.439308
	P-value	0.591923	0.101054	0.623547	0.382772	0.0864044	0.748913	0.223912	0.548013	0.55479	0.133996	4.33619e-05	0.000385887	0.319091	0.842395	8.43668e-85	2.81641e-18
Neurofilament light chain	Spearmans Rho	-0.0993924	-0.0184921	0.0333383	0.0741859	0.0409849	-0.0112565	-0.0353949	-0.0656162	-0.0334115	-0.0273718	0.0978024	0.0934083	0.0772191	-0.0755525	0.0621959	0.0457822	0.0786627
	P-value	0.0606518	0.727688	0.530087	0.161899	0.440117	0.83215	0.505008	0.216173	0.529184	0.606233	0.0649111	0.0779742	0.145373	0.154287	0.241129	0.388441	0.137975
GFAP	Spearmans Rho	-0.0232233	-0.0111338	-0.0154725	-0.00707601	-0.0565103	-0.0714881	0.0182544	0.0342152	-0.0275183	0.0851316	0.0159702	0.0534121	0.0448397	-0.0706369	-0.0477818	-0.037695	-0.033888	0.173088
	P-value	0.661886	0.833952	0.770794	0.894011	0.28695	0.17775	0.731053	0.519317	0.604306	0.10832	0.763637	0.314237	0.398293	0.182983	0.368036	0.477716	0.523323	0.00102438
